# Supplementary material
Source: PubMed Central journal article supplement (PMC4607659)
Supplement: NIHMS720795-supplement-2.pdf [file NIHMS720795-supplement-2.pdf]

**Figure S1**

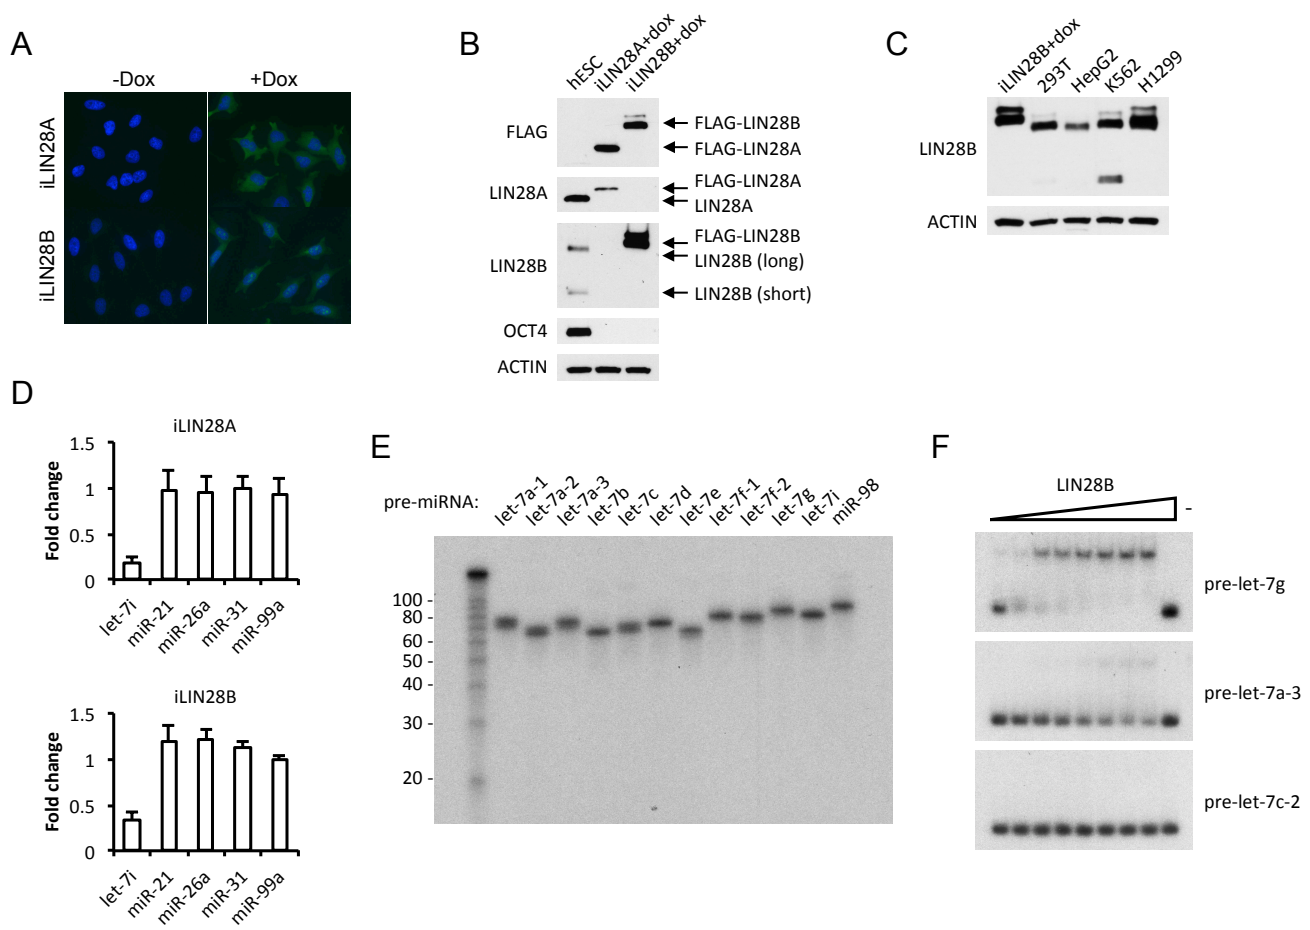

**Supplemental Figure 1 (Related to Figure 1): (A)** Immunofluorescence analyses of FLAG-LIN28A and FLAG-LIN28B localization in doxycycline-inducible HeLa cell lines. **(B)** Western blot for comparative analysis of LIN28A and LIN28B expression between human ESCs and doxycycline-treated iLIN28A and iLIN28B HeLa cell lines. **(C)** Western blot for comparative analysis of LIN28B expression between different human cancer cell lines and doxycycline-treated iLIN28B HeLa cell line. **(D)** q.RT-PCR analyses of miRNA expression in iLIN28A (left) and iLIN28B (right) HeLa cells. Results are the average of two biological replicate experiments represented as fold change relative to mock treated cells. Error bars represent SD. **(E)** Denaturing gel analysis for individual in vitro transcribed human let-7 pre-miRNA. **(F)** EMSA showing relative LIN28B binding to pre-let-7g, pre-let-7a-3 and pre-let-7c-2.

**Table S1 (related to experimental procedures):****PCR primers sequences for pri-miRNA subcloning into pCDNA3 plasmid**

| Name                      | Sequence                                    |
|---------------------------|---------------------------------------------|
| hsa-pri-let-7a-1 BamHI    | AACAAGGATCCTCAACGTAAGTGAATGAAAATGGTCTAATAC  |
| hsa-pri-let-7a-1 NotI     | AACAAGCGGCCGCCAGTGTACTTGCTACAGACTTTATC      |
| hsa-pri-let-7a-2 BamHI    | AACAAGGATCCTCTCTTCTATCATCAGACTCTTTGATATGTTG |
| hsa-pri-let-7a-2 NotI     | AACAAGCGGCCGCATATGAAAATACAGCATGGGTACAAGG    |
| hsa-pri-let-7a-3 BamHI    | AACAAGGATCCTGCCCGCCAGAATCCCT                |
| hsa-pri-let-7a-3 NotI     | AACAAGCGGCCGCTCACACAGCAAGTGGCACCTAG         |
| hsa-pri-let-7b BamHI      | AACAAGGATCCCAAGACCAGCCAGCAGCAGC             |
| hsa-pri-let-7b NotI       | AACAAGCGGCCGCTAGCTCCCAGATGCCACCCAGC         |
| hsa-pri-let-7c BamHI      | AACAAGGATCCAGAAACAGTTAGCAGCAAAGTTTACTGG     |
| hsa-pri-let-7c NotI       | AACAAGCGGCCGCAGATACAAATGGAATAATCTAATAGGGCTG |
| hsa-pri-let-7d BamHI      | AACAAGGATCCAAGTTCATATGGCCAGATAACTTTTC       |
| hsa-pri-let-7d NotI       | AACAAGCGGCCGCAGCACCATGCTGCAGTTTATAATC       |
| hsa-pri-let-7e BamHI      | AACAAGGATCCTTCGCCGCACACAAGCTCGTG            |
| hsa-pri-let-7e NotI       | AACAAGCGGCCGCTTTCAGGGGAAGGAGGGGATGCAGG      |
| hsa-pri-let-7f-1 BamHI    | AACAAGGATCCTGGGGAAACCTTTTGCTTCTTG           |
| hsa-pri-let-7f-1 NotI     | AACAAGCGGCCGCTGTTAATCTGTGCCTACTGTACTACTTG   |
| hsa-pri-let-7f-2 BamHI    | AACAAGGATCCACTGCATCTAAGTCAAATGACTCCAC       |
| hsa-pri-let-7f-2 NotI     | AACAAGCGGCCGCACTTCAAAGATGTACATGAACATGCTG    |
| hsa-pri-let-7g BamHI      | AACAAGGATCCGGATTCTCCAAATGTGGTGCAAG          |
| hsa-pri-let-7g NotI       | AACAAGCGGCCGCTAGTTATTCTACTGCTAACAATGACTCACC |
| hsa-pri-let-7i BamHI      | AACAAGGATCCGACGTCGGCGGCGAGGAAGG             |
| hsa-pri-let-7i NotI       | AACAAGCGGCCGCGAGGCTTCGCGGGCTGTCCC           |
| hsa-pri-miR-98 BamHI      | AACAAGGATCCAATGATTGTACCAAAGCCTGCAC          |
| hsa-pri-miR-98 NotI       | AACAAGCGGCCGCACTTTATAATGACATCTGCCTCACCC     |
| mmu-pri-let-7b HindIII    | AACAACAAGCTTGGCTTCCTCAATCTGTTTGGTAGG        |
| mmu-pri-let-7b XhoI       | AACAACCTCGAGTCTCATGTCTCTACGGCCAG            |
| mmu-pri-let-7c-2 HindIII* | AACAACAAGCTTTCCCAGTCTATTAATACCCTCAGC        |
| mmu-pri-let-7c-2 XhoI*    | AACAACCTCGAGAGAGGTCAAGGGACTATCCAAGG         |

\* these primers were also used for genotyping PCR of *let-7c-2<sup>-/-</sup>* clones

**PCR primers sequences for DNA template syntheses for in vitro transcription**

| Name                  | Sequence                                                             |
|-----------------------|----------------------------------------------------------------------|
| T7 hsa-pre-let-7a-1 F | ACGGTTCAGCTAATACGACTCACTATAGGGTGAGGTAGTAGGTTGTATAGTTTT<br>AGGGT      |
| T7 hsa-pre-let-7a-1 R | GAAAGACAGTAGATTGTATAGTTATCTCCCAG                                     |
| T7 hsa-pre-let-7a-2 F | ACGGTTCAGCTAATACGACTCACTATAGGGTGAGGTAGTAGGTTGTATAGTTTA<br>GAATTACATC |
| T7 hsa-pre-let-7a-2 R | GGAAAGCTAGGAGGCTGTACAGTTATCTCC                                       |
| T7 hsa-pre-let-7a-3 F | ACGGTTCAGCTAATACGACTCACTATAGGGTGAGGTAGTAGGTTGTATAGTTTT<br>GG         |

|                                    |                                                                      |
|------------------------------------|----------------------------------------------------------------------|
| T7 hsa-pre-let-7a-3 R              | GAAAGACAGTAGATTGTATAGTTATCCCATAGC                                    |
| T7 hsa-pre-let-7c F                | ACGGTTCAGCTAATACGACTCACTATAGGGTGAGGTAGTAGGTTGTATGGTTT<br>GAGTTA      |
| T7 hsa-pre-let-7c R                | GGAAAGCTAGAAGGTTGTACAGTTAACTC                                        |
| T7 hsa-pre-let-7d F                | ACGGTTCAGCTAATACGACTCACTATAGGGAGAGGTAGTAGGTTGCATAGTTTT<br>AGG        |
| T7 hsa-pre-let-7d R                | AAGAAAGGCAGCAGGTCGTATAG                                              |
| T7 hsa-pre-let-7e F                | ACGGTTCAGCTAATACGACTCACTATAGGGTGAGGTAGGAGGTTGTATAGTTG<br>AGG         |
| T7 hsa-pre-let-7e R                | GGAAAGCTAGGAGGCCGTATAGTG                                             |
| T7 hsa-pre-let-7f-1 F              | ACGGTTCAGCTAATACGACTCACTATAGGGTGAGGTAGTAGATTGTATAGTTGT<br>GGGG       |
| T7 hsa-pre-let-7f-1 R              | GGGAAGGCAATAGATTGTATAGTTATCTCC                                       |
| T7 hsa-pre-let-7f-2 F              | ACGGTTCAGCTAATACGACTCACTATAGGGTGAGGTAGTAGATTGTATAGTTTT<br>AGGGTCATAC |
| T7 hsa-pre-let-7f-2 R              | GGAAAGACAGTAGACTGTATAGTTATCTCCA                                      |
| T7 hsa-pre-let-7g<br>GGAG/UGCG F   | ACGGTTCAGCTAATACGACTCACTATAGGGTGAGGTAGTAGTTTGTACAGTTTG<br>AGG        |
| T7 hsa-pre-let-7g<br>GGAG/UGCG R   | GCAAGGCAGTGGCCTGTACAGTTATC                                           |
| T7 hsa-pre-let-7i F                | ACGGTTCAGCTAATACGACTCACTATAGGGTGAGGTAGTAGTTTGTGCTGTTGG               |
| T7 hsa-pre-let-7i R                | AGCAAGGCAGTAGCTTGC                                                   |
| T7 hsa-pre-miR-98 F                | ACGGTTCAGCTAATACGACTCACTATAGGGTGAGGTAGTAAGTTGTATTGTTGT<br>GGG        |
| T7 hsa-pre-miR-98 R                | GGGAAAGTAGTAAGTTGTATAGTTATCTTCTAATTGG                                |
| T7 mmu-pre-let-7b F                | ACGGTTCAGCTAATACGACTCACTATAGGGTGAGGTAGTAGGTTGTGTGGTTTC               |
| T7 mmu-pre-let-7b R                | GGGAAGGCAGTAGGTTGTATAGTTATC                                          |
| T7 mmu-pre-let-7c-2<br>UGCG/GGAG F | ACGGTTCAGCTAATACGACTCACTATAGGGTGAGGTAGTAGGTTGTATGGTTTT<br>GG         |
| T7 mmu-pre-let-7c-2<br>UGCG R      | GGAAAGACAGTAGATTGTATAGTTACCGC                                        |
| T7 mmu-pre-let-7c-2<br>GGAG R      | GGAAAGACAGTAGATTGTATAGTTACCTCC                                       |

### PCR primer sequences for subcloning LIN28 cDNA into pCDNA5

| Name              | Sequence                                                         |
|-------------------|------------------------------------------------------------------|
| FLAG-LIN28A EcoRV | AACAAGATATCACCATGGACTACAAAGACGATGAC                              |
| FLAG-LIN28A NotI  | AACAAGCGGCCGCTTAATTCTGTGCCTCCGGGAG                               |
| FLAG-LIN28B EcoRV | AACAAGATATCACCATGGACTACAAAGACGATGACGACAAGGCCGAAGGCCGGG<br>GCTAGC |
| FLAG-LIN28B NotI  | AACAAGCGGCCGCTTATGTCTTTTTCTTTTTTGAAGTGAAGG                       |

### PCR primer sequences for mutagenesis

| Name                               | Sequence                                                   |
|------------------------------------|------------------------------------------------------------|
| mmu-pre-let-7c-2 GGAG<br>sense     | GGGCTCTGCCCGCTCGGAGGTAACATACAATCTA                         |
| mmu-pre-let-7c-2 GGAG<br>antisense | TAGATTGTATAGTTACCTCCGAGCGGGGCAGAGCCC                       |
| mmu-pre-let-7c-2<br>UCACA sense    | AGGTAGTAGGTTGTATGGTTTTGGGTCACACCCCGCTCTGCGGTAACATACAA<br>T |

|                                     |                                                             |
|-------------------------------------|-------------------------------------------------------------|
| mmu-pre-let-7c-2<br>UCACA antisense | ATTGTATAGTTACCGCAGAGCGGGGTGTGACCCAAAACCATACAACCTACTAC<br>CT |
| mmu-pre-let-7c-2<br>CCACG sense     | GGTTGTATGGTTTTGGGCCACGCCCGCTCTGCGGTAAC                      |
| mmu-pre-let-7c-2<br>CCACG antisense | GTTACCGCAGAGCGGGGCGTGGCCAAAACCATACAACC                      |
| mmu-pre-let-7c-2<br>CUAUG sense     | GGTTGTATGGTTTTGGGCTATGCCCGCTC                               |
| mmu-pre-let-7c-2<br>CUAUG antisense | GAGCGGGGCATAGCCAAAACCATACAACC                               |
| mmu-pre-let-7c-2<br>UUCUA sense     | GCAGAGCGGGGTAGAACCCAAAACCATACAACC                           |
| mmu-pre-let-7c-2<br>UUCUA antisense | GGTTGTATGGTTTTGGGTTCTACCCCGCTCTGC                           |
| mmu-pre-let-7g UGCG<br>sense        | ATGATACCACCCGGTACATGCGATAACTGTACAGGCCAC                     |
| mmu-pre-let-7g UGCG<br>antisense    | GTGGCCTGTACAGTTATCGCATGTACCGGGTGGTATCAT                     |

### Oligonucleotide sequences for gRNA cloning into pX330 for CRISPR/Cas9 genome editing

| Name                         | Sequence                  |
|------------------------------|---------------------------|
| let-7c-2 gRNA#1 sense        | CACCGAGTGGATACAACGGCGGCC  |
| let-7c-2 gRNA#1<br>antisense | AAACGGGCCCGCGTTGTATCCACTC |
| let-7c-2 gRNA#2 sense        | CACCGTGTATAGTTACCGCAGAGCG |
| let-7c-2 gRNA#2<br>antisense | AAACCGCTCTGCGGTAACATACAC  |
